# Supplementary material for: Soluble High Mobility Group Box 1 (HMGB1) Is a Promising Biomarker for Prediction of Therapy Response and Prognosis in Advanced Lung Cancer Patients
Source: PubMed Central journal article supplement (PMC7924191; doi:10.3390/diagnostics11020356), 2021-02-20
Supplement: diagnostics-11-00356-s001.pdf [file diagnostics-11-00356-s001.pdf]

## Supporting Information to „Soluble High Mobility Group Box 1 (HMGB1) is a Highly Valuable Biomarker for Prediction of Therapy Response and Prognosis in Advanced Lung Cancer Patients”

Nikolaus A. Handke, Alexander Rupp, Nicolai Trimpop, Joachim von Pawel, Stefan Holdenrieder

### 1 Subgroup analyses of HMGB1 in adenocarcinomas and squamous cell carcinomas

#### 1.1 Concentrations of HMGB1 at the different time points

Table 1: HMGB1 concentrations in patients with adenocarcinomas.

| Time point             | Response | N  | Median | IQR   | Range         | p-Value           |
|------------------------|----------|----|--------|-------|---------------|-------------------|
| Pretherapeutic         | R        | 16 | 2.64   | 2.5   | 0.3 – 10.6    | 0.448             |
|                        | NR       | 14 | 3.69   | 2.9   | 0.5 – 8.3     |                   |
| Cycle 2                | R        | 15 | 1.20   | 2.6   | 0.3 – 4.6     | <b>0.014</b>      |
|                        | NR       | 14 | 3.39   | 3.6   | 0.3 – 38.8    |                   |
| Cycle 3                | R        | 16 | 0.57   | 1.3   | 0.3 – 3.6     | <b>&lt; 0.001</b> |
|                        | NR       | 12 | 4.25   | 4.1   | 0.9 – 36.7    |                   |
| Changes Cycles 1-2 (%) | R        | 16 | 39.2   | 58.5  | 0 – 135.3     | <b>0.002</b>      |
|                        | NR       | 14 | 94.8   | 87.1  | 30.6 – 2446.3 |                   |
| Changes Cycles 1-3 (%) | R        | 16 | 46.2   | 56.6  | 4.7 – 108.6   | 0.077             |
|                        | NR       | 14 | 78.6   | 133.1 | 0 – 2317.0    |                   |

Table 2: HMGB1 concentrations in patients with squamous cell carcinomas.

| Time point             | Response | N  | Median | IQR   | Range        | p-Value      |
|------------------------|----------|----|--------|-------|--------------|--------------|
| Pretherapeutic         | R        | 15 | 2.84   | 3.2   | 0.3 – 13.4   | 0.760        |
|                        | NR       | 11 | 2.47   | 0.8   | 0.9 – 11.0   |              |
| Cycle 2                | R        | 15 | 2.11   | 4.1   | 0.3 – 6.6    | 0.097        |
|                        | NR       | 11 | 3.22   | 4.7   | 1.2 – 14.3   |              |
| Cycle 3                | R        | 14 | 2.10   | 3.1   | 0.3 – 7.2    | <b>0.001</b> |
|                        | NR       | 10 | 5.02   | 3.7   | 2.8 – 26.9   |              |
| Changes Cycles 1-2 (%) | R        | 15 | 93.9   | 106.7 | 3.8 – 258.2  | 0.305        |
|                        | NR       | 11 | 130.6  | 184.7 | 15.8 – 508.7 |              |
| Changes Cycles 1-3 (%) | R        | 15 | 50.9   | 168.1 | 0 – 636.7    | 0.069        |
|                        | NR       | 11 | 186.1  | 492.1 | 0 – 952.9    |              |

Patients with adenocarcinomas did not differ from patients with squamous cell carcinomas in terms of response to therapy according to a  $\chi^2$  test ( $\chi^2 = 0.107$ ,  $p = 0.793$ ).

#### 1.2 ROC curve analyses

Table 3: Performance of HMGB1 for prediction of non-response to therapy in the subgroups of adenocarcinomas and squamous cell carcinomas. Calculation of Receiver Operating Characteristic (ROC) curve analyses show sensitivity and

specificity for prediction / detection of progressive disease of NSCLC patients over the whole spectrum of possible cutoff values. Performance criteria are the area under the curve (AUC) and the sensitivities at specificities of 90% and 95%.

| Time point            | AUC   | 95% CI        | Sensitivity at 90% Specificity | Sensitivity at 95% Specificity | p-value           |
|-----------------------|-------|---------------|--------------------------------|--------------------------------|-------------------|
| <b>Pretherapeutic</b> |       |               |                                |                                |                   |
| Adeno                 | 0.585 | 0.374 – 0.796 | 0.000                          | 0.000                          | 0.430             |
| Squamous cell         | 0.461 | 0.232 – 0.689 | 0.091                          | 0.000                          | 0.736             |
| <b>Cycle 2</b>        |       |               |                                |                                |                   |
| Adeno                 | 0.764 | 0.590 – 0.939 | 0.357                          | 0.357                          | <b>0.015</b>      |
| Squamous cell         | 0.697 | 0.494 – 0.900 | 0.364                          | 0.091                          | 0.092             |
| <b>Cycle 3</b>        |       |               |                                |                                |                   |
| Adeno                 | 0.896 | 0.779 – 1.000 | 0.750                          | 0.583                          | <b>&lt; 0.001</b> |
| Squamous cell         | 0.879 | 0.739 – 1.000 | 0.400                          | 0.300                          | <b>0.002</b>      |

### 1.3 Survival analyses

Median concentrations of the respective subgroup at the respective time point were used as cutoff values in Kaplan-Meier analyses.

Table 4: Performance of HMGB1 in adenocarcinomas and squamous cell carcinomas for prognosis of overall survival. Kaplan-Meier and Log-Rank analyses show of the prognostic value of biomarkers in NSCLC patients if median is used as cutoff. Median overall survival (OS) in days (d) with 95% confidence intervals (CI) is given for the group with values below and above the cutoff. P-values were calculated according to Log-Rank analyses.

|                         | Below cutoff |               |           | Above cutoff  |           | p-value      |
|-------------------------|--------------|---------------|-----------|---------------|-----------|--------------|
|                         | Cutoff       | Median OS (d) | 95% CI    | Median OS (d) | 95% CI    |              |
| <b>Pretherapeutic</b>   |              |               |           |               |           |              |
| Adeno                   | 2.76         | 624           | 0 – 1390  | 66            | 82 – 340  | <b>0.038</b> |
| Squamous cell           | 2.56         | 190           | 50 – 330  | 292           | 130 – 454 | 0.390        |
| <b>Prior to cycle 2</b> |              |               |           |               |           |              |
| Adeno                   | 2.35         | 429           | 112 – 746 | 75            | 0 – 282   | <b>0.025</b> |
| Squamous cell           | 2.59         | 190           | 168 – 212 | 267           | 129 – 405 | 0.880        |
| <b>Prior to cycle 3</b> |              |               |           |               |           |              |
| Adeno                   | 1.35         | 624           | 0 – 1268  | 62            | 78 – 320  | 0.167        |
| Squamous cell           | 3.03         | 267           | 0 – 542   | 180           | 104 – 256 | 0.072        |
